# Supplementary material
Source: Springer Nature journal article supplement (https://www.springermedizin.de/resource/supplementary/13054_2010_9339_MOESM4_ESM.pdf/9705980)

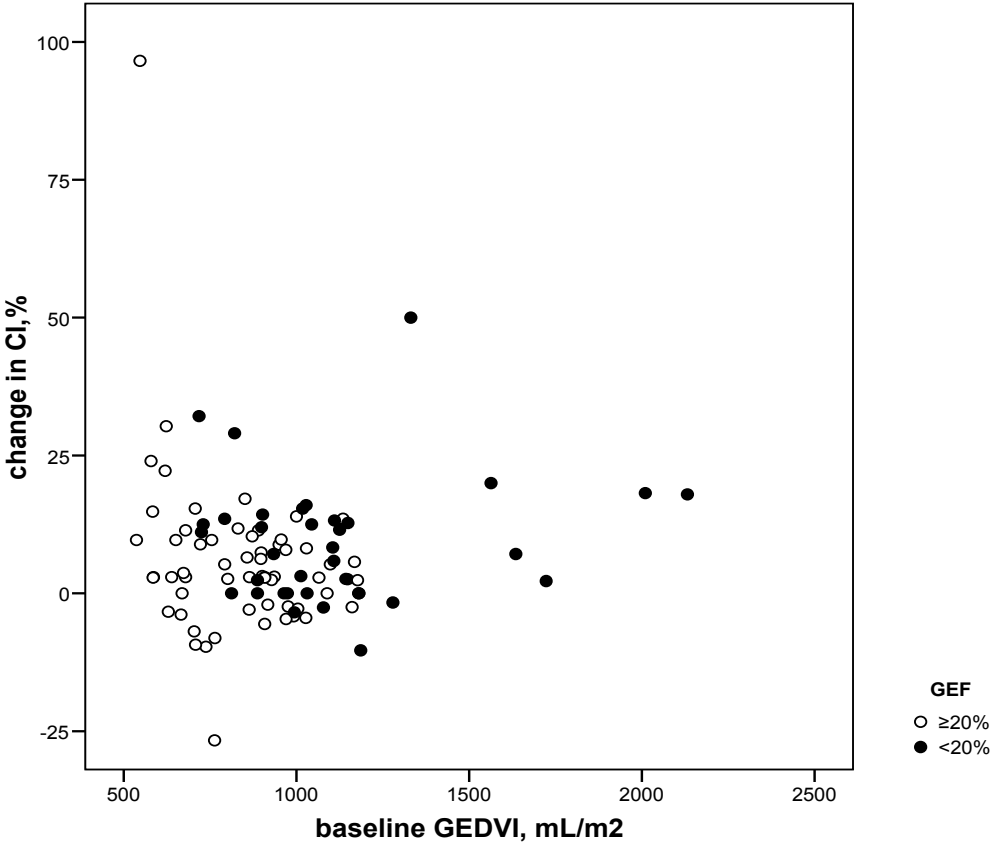

Supplement: MOESM4 [file 9705980]
